# Supplementary material
Source: HighWire-hosted journal article supplement (http://ajnr-stage2.highwire.org/highwire/filestream/182798/field_highwire_adjunct_files/0/18-01140.pdf)
Supplement: 18-01140.pdf [file 18-01140.pdf]

**On-line Table: Scoring algorithm to calculate point values for the risk score**

|                              | Reference Value (Wij) | Regression Coefficient ( $\beta$ ) <sup>a</sup> | Distance from Reference Group = $\beta \times (Wij - Wref)$ | Point Value = $\beta \times (Wij - Wref) / B$ <sup>b</sup> | Points <sup>c</sup> |
|------------------------------|-----------------------|-------------------------------------------------|-------------------------------------------------------------|------------------------------------------------------------|---------------------|
| T-stage                      |                       |                                                 |                                                             |                                                            |                     |
| 1                            | 0 (Wref)              |                                                 |                                                             |                                                            | 0                   |
| 2                            | 1                     | −0.034                                          | −0.034                                                      | −0.036                                                     | 0                   |
| 3 or 4                       | 1                     | 0.623                                           | 0.623                                                       | 0.656                                                      | 1                   |
| Shortest axial diameter (cm) |                       | 1.900                                           |                                                             |                                                            |                     |
| <1                           | 0.650 (Wref)          |                                                 |                                                             |                                                            | 0                   |
| 1–2                          | 1.302                 |                                                 | 1.239                                                       | 1.304                                                      | 1                   |
| ≥2                           | 2.585                 |                                                 | 3.677                                                       | 3.870                                                      | 4                   |
| L/S ratio                    |                       | −0.685                                          |                                                             |                                                            |                     |
| <1.5                         | 1.220                 |                                                 | 0.750                                                       | 0.789                                                      | 1                   |
| 1.5–2                        | 1.698                 |                                                 | 0.422                                                       | 0.444                                                      | 0                   |
| ≥2                           | 2.315 (Wref)          |                                                 |                                                             |                                                            | 0                   |
| Necrosis                     |                       |                                                 |                                                             |                                                            |                     |
| 0                            | 0 (Wref)              |                                                 |                                                             |                                                            | 0                   |
| 1                            | 1                     | 2.722                                           | 2.722                                                       | 2.865                                                      | 3                   |
| 2                            | 1                     | 3.080                                           | 3.080                                                       | 3.242                                                      | 3                   |
| Total score                  |                       |                                                 |                                                             |                                                            | 9                   |

**Note:**—Wref represents a referent risk factor profile to set a baseline value for each risk factor; the base value is the value assigned 0 points in the scoring system; Wij, the reference values of each category (eg, 1.302 cm for the 1–2 category of shortest axial diameter).

<sup>a</sup> The regression coefficients of each variable were derived from the multivariable logistic regression analysis.

<sup>b</sup> Constant B (B = 0.950) is the number of regression units that reflect 1 point in the final point system. This value was chosen on the basis of work by Sullivan et al<sup>23</sup> to represent the increased risk for metastasis. The value was defined as the effect of a 5-mm increase in the minimal axial diameter of the lymph node.

<sup>c</sup> Generated from point values [ $\beta \times (Wij - Wref) / B$ ], which were rounded to the nearest integer and scaled so that a single point was equivalent to the increase in risk for lymph node metastasis.
